# Supplementary material for: Differential temporal expression of milk miRNA during the lactation cycle of the marsupial tammar wallaby (Macropus eugenii)
Source: PubMed Central journal article supplement (PMC4247635; doi:10.1186/1471-2164-15-1012), 2014-11-23
Supplement: 12864_2014_6694_MOESM4_ESM.pdf [file 12864_2014_6694_MOESM4_ESM.pdf]

**Additional file 4: Primer sequences used for miRNA quantification by PCR.**

| <b>miRNAs</b>                   | <b>Stem-loop primers</b>                                              | <b>Forward primers</b>         |
|---------------------------------|-----------------------------------------------------------------------|--------------------------------|
| <b>mir148</b>                   | GTC GTA TCC AGT GC. GGG TCC GAG GTA TTC GCA<br>CTG GAT ACG AC ACA AAG | CCG GGC TCA GTG CAC<br>TAC AG  |
| <b>mir22</b>                    | GTC GTA TCC AGT GCA GGG TCC GAG GTA TTC GCA<br>CTG GAT ACG AC GCA GTT | CCA GGC AAG CTG CCA<br>GTT G   |
| <b>mir141</b>                   | GTC GTA TCC AGT GCA GGG TCC GAG GTA TTC GCA<br>CTG GAT ACG AC GCA TCT | CGC GCC TAA CAC TGT<br>CTG GTA |
| <b>miR30a</b>                   | GTC GTA TCC AGT GCA GGG TCC GAG GTA TTC GCA<br>CTG GAT ACG AC CTT CCA | GGC GCG TGT AAA CAT<br>CCT CGA |
| <b>miR92</b>                    | GTC GTA TCC AGT GCA GGG TCC GAG GTA TTC GCA<br>CTG GAT ACG AC CAG GCC | GCG CTT ATT GCA CTT<br>GTC CCG |
| <b>cel-miR-54</b>               | GTC GTA TCC AGT GCA GGG TCC GAG GTA TTC GCA<br>CTG GAT ACG AC CTC GGA | CGC GCG TAC CCG TAA<br>TCT TCA |
| <b>cel-miR-39</b>               | GTC GTA TCC AGT GCA GGG TCC GAG GTA TTC GCA<br>CTG GAT ACG AC CAA GCT | GAG CGC TCA CCG GGT<br>GTA     |
| <b>Universal reverse primer</b> |                                                                       | CCA GTG CAG GGT CCG<br>AGG TA  |
